# Supplementary material
Source: PubMed Central journal article supplement (PMC9834912)
Supplement: NIHMS1860803-supplement-1.pdf [file NIHMS1860803-supplement-1.pdf]

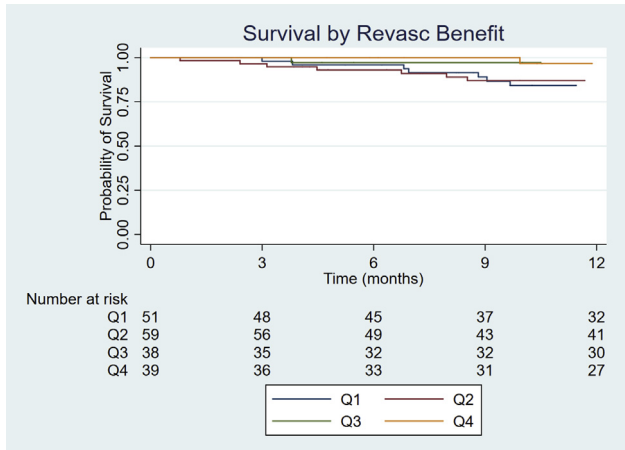

**Supplementary Table I (online only).** Wifl scores categorized by estimated benefit of revascularization quartiles<sup>a</sup>

| Revascularization benefit quartile | Wifl score                                                                                                                                                              |
|------------------------------------|-------------------------------------------------------------------------------------------------------------------------------------------------------------------------|
| Q1 (highest benefit)               | W1, I2, fl2; W1, I3, fl3; W2, I1, fl3; W3, I2, fl3; W1, I2, fl1; W1, I3, fl0; W2, I2, fl0; W2, I2, fl1; W1, I3, fl2; W3, I2, fl0; W1, I3, fl1; W2, I1, fl2              |
| Q2 (moderate benefit)              | W2, I3, fl0; W2, I2, fl2; W3, I3, fl1; W2, I3, fl1; W3, I2, fl1; W1, I1, fl2; W2, I2, fl3; W2, I3, fl2; W3, I3, fl0; W1, I2, fl0; W2, I1, fl1; W0, I3, fl0              |
| Q3 (low benefit)                   | W2, I1, fl0; W3, I2, fl2; W0, I1, fl1; W0, I2, fl1; W0, I2, fl0; W2, I3, fl3; W1, I1, fl1; W0, I1, fl0; W1, I0, fl1; W2, I0, fl0; W2, I0, fl2; W1, I1, fl0              |
| Q4 (questionable benefit)          | W3, I1, fl0; W3, I3, fl2; W1, I0, fl0; W2, I0, fl1; W3, I3, fl3; W3, I0, fl1; W3, I1, fl2; W0, I0, fl0; W3, I1, fl1; W3, I1, fl3; W3, I0, fl0; W1, I0, fl2; W3, I0, fl2 |

*fl*, Foot infection; *I*, ischemia; *Q*, Quartile; *W*, wound; *Wifl*, Wound, Ischemia, and foot Infection.

<sup>a</sup>Data from Mayor J, Chung J, Zhang Q, Montero-Baker M, Schanzer A, Conte MS, et al. Using the Society for Vascular Surgery Wound, Ischemia, and foot Infection classification to identify patients most likely to benefit from revascularization. *J Vasc Surg* 2019;70:776-85.e1.

**Supplementary Fig (online only).** Kaplan-Meier curves showing survival for diabetic patients who had undergone lower extremity revascularization stratified by quartile of estimated benefit of revascularization. All standard errors were <10%.

**Supplementary Table II (online only).** Distribution of treated limbs stratified by Wifl grade<sup>a</sup>

| Grade          | Ischemia grade |   |   |   |    |   |    |   |   |   |   |   |    |   |    |   |
|----------------|----------------|---|---|---|----|---|----|---|---|---|---|---|----|---|----|---|
|                | 0              |   |   |   | 1  |   |    |   | 2 |   |   |   | 3  |   |    |   |
| Wound          |                |   |   |   |    |   |    |   |   |   |   |   |    |   |    |   |
| 0              | 0              | 0 | 0 | 0 | 4  | 0 | 0  | 0 | 4 | 0 | 0 | 0 | 4  | 0 | 0  | 0 |
| 1              | 1              | 0 | 1 | 0 | 7  | 1 | 7  | 1 | 3 | 3 | 4 | 1 | 3  | 3 | 7  | 0 |
| 2              | 4              | 1 | 2 | 0 | 14 | 3 | 11 | 1 | 9 | 0 | 3 | 1 | 16 | 6 | 7  | 1 |
| 3              | 1              | 0 | 1 | 0 | 8  | 3 | 10 | 1 | 8 | 0 | 1 | 2 | 6  | 1 | 11 | 1 |
| Foot infection |                |   |   |   |    |   |    |   |   |   |   |   |    |   |    |   |
| 0              | 0              | 1 | 2 | 3 | 0  | 1 | 2  | 3 | 0 | 1 | 2 | 3 | 0  | 1 | 2  | 3 |

*Wifl*, Wound, ischemia, and foot infection.  
<sup>a</sup>Mills JL Sr, Conte MS, Armstrong DG, Pomposelli FB, Schanzer A, Sidawy AN, et al. The Society for Vascular Surgery lower extremity threatened limb classification system: risk stratification based on Wound, Ischemia, and foot Infection (Wifl). *J Vasc Surg* 2014;59:220-34.e1-2.

**Supplementary Table III (online only).** Distribution of limbs requiring major amputation by 1 year (n = 16) stratified by Wifl grade<sup>a</sup>

| Grade          | Ischemia grade |   |   |   |   |   |   |   |   |   |   |   |   |   |   |   |
|----------------|----------------|---|---|---|---|---|---|---|---|---|---|---|---|---|---|---|
|                | 0              |   |   |   | 1 |   |   |   | 2 |   |   |   | 3 |   |   |   |
| Wound          |                |   |   |   |   |   |   |   |   |   |   |   |   |   |   |   |
| 0              | 0              | 0 | 0 | 0 | 0 | 0 | 0 | 0 | 0 | 0 | 0 | 0 | 0 | 0 | 0 | 0 |
| 1              | 0              | 0 | 0 | 0 | 1 | 0 | 0 | 0 | 0 | 0 | 0 | 0 | 0 | 0 | 2 | 0 |
| 2              | 1              | 0 | 0 | 0 | 0 | 0 | 0 | 0 | 0 | 0 | 1 | 0 | 1 | 0 | 0 | 0 |
| 3              | 0              | 0 | 1 | 0 | 0 | 0 | 3 | 0 | 0 | 0 | 0 | 1 | 0 | 0 | 5 | 0 |
| Foot infection |                |   |   |   |   |   |   |   |   |   |   |   |   |   |   |   |
| 0              | 0              | 1 | 2 | 3 | 0 | 1 | 2 | 3 | 0 | 1 | 2 | 3 | 0 | 1 | 2 | 3 |

*Wifl*, Wound, ischemia, and foot infection.  
<sup>a</sup>Mills JL Sr, Conte MS, Armstrong DG, Pomposelli FB, Schanzer A, Sidawy AN, et al. The Society for Vascular Surgery lower extremity threatened limb classification system: risk stratification based on Wound, Ischemia, and foot Infection (Wifl). *J Vasc Surg* 2014;59:220-34.e1-2.

**Supplementary Table IV (online only).** Observed vs expected<sup>a</sup> rates of 1-year major amputation using different clinical scoring systems

| Classification system                                | 1-Year major amputation |             |                    |
|------------------------------------------------------|-------------------------|-------------|--------------------|
|                                                      | Observed, %             | Expected, % | O/E ratio (95% CI) |
| Wifl stage (major amputation)                        |                         |             |                    |
| 1                                                    | 8.3                     | 10.8        | 0.93 (0.02-3.42)   |
| 2                                                    | 5.6                     | 4.9         | 1.46 (0.04-5.38)   |
| 3                                                    | 0                       | 5.1         | 0 (0-0)            |
| 4                                                    | 16.7                    | 13.4        | 1.24 (0.68-1.97)   |
| Wifl stage (revascularization benefit)               |                         |             |                    |
| 1                                                    | 18.2                    | ND          | NA                 |
| 2                                                    | 10.0                    | ND          | NA                 |
| 3                                                    | 7.9                     | ND          | NA                 |
| 4                                                    | 12.7                    | ND          | NA                 |
| Estimated benefit of revascularization (Mayor et al) |                         |             |                    |
| Q1                                                   | 8.8                     | 4.4         | 2.01 (0.41-4.83)   |
| Q2                                                   | 4.8                     | 14.8        | 0.32 (0.04-0.90)   |
| Q3                                                   | 6.7                     | 28.1        | 0.24 (0.03-0.66)   |
| Q4                                                   | 29.0                    | 51.2        | 0.57 (0.26-0.99)   |

NA, Not applicable; ND, not defined; Q, quartile; Wifl, wound, ischemia, foot infection.

<sup>a</sup>Expected rate of 1-year major amputation determined from those reported by Mayor et al (Mayor J, Chung J, Zhang Q, Montero-Baker M, Schanzer A, Conte MS, et al. Using the Society for Vascular Surgery Wound, Ischemia, and foot Infection classification to identify patients most likely to benefit from revascularization. J Vasc Surg 2019;70:776-85.e1).
